# Supplementary material
Source: Springer Nature journal article supplement (https://www.springermedizin.de/resource/supplementary/13756_2014_597_MOESM1_ESM.pdf/9683416)
Supplement: MOESM1 [file 9683416]

| Study (Year)                   | Representativeness of the exposed cohort (1 star allowed)                                             | Selection of the non exposed cohort | Ascertainment of exposure | Demonstration that outcome of interest was not present at start of study | Comparability of cohorts on the basis of the design or analysis (2 stars allowed) | Ascertainment of outcome (1 star allowed) | Was follow-up long enough for outcomes to occur | Adequacy of follow up of cohorts | Overall ROB |
|--------------------------------|-------------------------------------------------------------------------------------------------------|-------------------------------------|---------------------------|--------------------------------------------------------------------------|-----------------------------------------------------------------------------------|-------------------------------------------|-------------------------------------------------|----------------------------------|-------------|
|                                |                                                                                                       |                                     |                           |                                                                          | analysis)                                                                         |                                           |                                                 |                                  |             |
| Furtado <i>et al.</i> (2009)   | *                                                                                                     | *                                   | *                         | *                                                                        | *                                                                                 | *                                         | *                                               | *                                | Medium      |
|                                |                                                                                                       |                                     |                           |                                                                          | (excessively matched for outcome; adjusted analysis)                              |                                           |                                                 |                                  |             |
| Furtado <i>et al.</i> (2011) P | *                                                                                                     | *                                   | *                         | *                                                                        | (no adjusted analysis or matching)                                                | *                                         | *                                               | *                                | High        |
| Gasink <i>et al.</i> (2006)    | *<br>(subjects included more than once (ie, if they had <i>P. aeruginosa</i> isolates >30 days apart) | *                                   | *                         | *                                                                        | *                                                                                 | *                                         | *                                               | *                                | Medium      |
|                                |                                                                                                       |                                     |                           |                                                                          | (unmatched; adjusted analysis)                                                    |                                           |                                                 |                                  |             |
| Hirakata <i>et al.</i> (2003)  | *                                                                                                     | *                                   | *                         | *                                                                        | *                                                                                 | *                                         | *                                               | *                                | Medium      |
|                                |                                                                                                       |                                     |                           |                                                                          | (Matched. No adjusted analyses)                                                   |                                           |                                                 |                                  |             |
| Kaminski <i>et al.</i> (2011)  | *                                                                                                     | *                                   | *                         | *                                                                        | **                                                                                | *                                         | *                                               | *                                | Low         |
|                                |                                                                                                       |                                     |                           |                                                                          | (matched for prior ICU stay; adjusted                                             |                                           |                                                 |                                  |             |

| Study (Year)                    | Representativeness of the exposed cohort (1 star allowed) | Selection of the non exposed cohort | Ascertainment of exposure | Demonstration that outcome of interest was not present at start of study | Comparability of cohorts on the basis of the design or analysis (2 stars allowed) | Ascertainment of outcome (1 star allowed) | Was follow-up long enough for outcomes to occur | Adequacy of follow up of cohorts | Overall ROB |
|---------------------------------|-----------------------------------------------------------|-------------------------------------|---------------------------|--------------------------------------------------------------------------|-----------------------------------------------------------------------------------|-------------------------------------------|-------------------------------------------------|----------------------------------|-------------|
|                                 |                                                           |                                     |                           |                                                                          | analysis)                                                                         |                                           |                                                 |                                  |             |
| Lambert <i>et al.</i> (2011) P  | *                                                         | *                                   | *                         | *                                                                        | *                                                                                 | *                                         | *                                               | *                                | Medium      |
|                                 |                                                           |                                     |                           |                                                                          | (unmatched; adjusted analysis)                                                    |                                           |                                                 |                                  |             |
| Lautenbach <i>et al.</i> (2010) | *                                                         | *                                   | *                         | *                                                                        | *                                                                                 | *                                         | *                                               | *                                | Medium      |
|                                 |                                                           |                                     |                           |                                                                          | (unmatched; adjusted analysis)                                                    |                                           |                                                 |                                  |             |
| Montero <i>et al.</i> (2009)    | *                                                         | *                                   | *                         | *                                                                        | *                                                                                 | *                                         | *                                               | *                                | Medium      |
|                                 |                                                           |                                     |                           |                                                                          | (matched for 3 variables; issue: matched variable also used in adjusted analysis) |                                           |                                                 |                                  |             |
| Morales <i>et al.</i> (2012)    | *                                                         | *                                   | *                         | *                                                                        | *                                                                                 | *                                         | *                                               | *                                | Medium      |
|                                 |                                                           |                                     |                           |                                                                          | (unmatched; adjusted analysis)                                                    |                                           |                                                 |                                  |             |

| Study (Year)                       | Representativeness of the exposed cohort (1 star allowed) | Selection of the non exposed cohort | Ascertainment of exposure | Demonstration that outcome of interest was not present at start of study | Comparability of cohorts on the basis of the design or analysis (2 stars allowed) | Ascertainment of outcome (1 star allowed) | Was follow-up long enough for outcomes to occur | Adequacy of follow up of cohorts | Overall ROB |
|------------------------------------|-----------------------------------------------------------|-------------------------------------|---------------------------|--------------------------------------------------------------------------|-----------------------------------------------------------------------------------|-------------------------------------------|-------------------------------------------------|----------------------------------|-------------|
| Paramythiotou <i>et al.</i> (2004) | *                                                         | *                                   | *                         | *                                                                        | *                                                                                 | *                                         | *                                               | *                                | Medium      |
|                                    |                                                           |                                     |                           |                                                                          | (matched for 2 variables; issue: reported outcome was used in matched variable)   |                                           |                                                 |                                  |             |
| Peña <i>et al.</i> (2013)          | *                                                         | *                                   | *                         | *                                                                        | *                                                                                 | *                                         | *                                               | *                                | Medium      |
|                                    |                                                           |                                     |                           |                                                                          | (unmatched; adjusted analysis)                                                    |                                           |                                                 |                                  |             |
| Scheetz <i>et al.</i> (2006)       | *                                                         | *                                   | *                         | *                                                                        | *                                                                                 | *                                         | *                                               | *                                | High        |
|                                    |                                                           |                                     |                           |                                                                          | (No adjusted analyses; unmatched)                                                 |                                           |                                                 |                                  |             |
| Söderström <i>et al.</i> (2009)    | *                                                         | *                                   | *                         | *                                                                        | *                                                                                 | *                                         | *                                               | *                                | Medium      |
|                                    |                                                           |                                     |                           |                                                                          | (Well matched. No adjusted analyses)                                              |                                           |                                                 |                                  |             |
| Tam <i>et al.</i> (2009)           | *                                                         | *                                   | *                         | *                                                                        | *                                                                                 | *                                         | *                                               | *                                | High        |
|                                    |                                                           |                                     |                           |                                                                          | (No adjusted analyses; unmatched)                                                 |                                           |                                                 |                                  |             |

| Study (Year)                     | Representativeness of the exposed cohort (1 star allowed) | Selection of the non exposed cohort | Ascertainment of exposure | Demonstration that outcome of interest was not present at start of study | Comparability of cohorts on the basis of the design or analysis (2 stars allowed) | Ascertainment of outcome (1 star allowed) | Was follow-up long enough for outcomes to occur | Adequacy of follow up of cohorts | Overall ROB |
|----------------------------------|-----------------------------------------------------------|-------------------------------------|---------------------------|--------------------------------------------------------------------------|-----------------------------------------------------------------------------------|-------------------------------------------|-------------------------------------------------|----------------------------------|-------------|
| Tam <i>et al.</i> (2010)         | *                                                         | *                                   | *                         | *                                                                        | **<br>(matched; adjusted analysis)                                                | *                                         | *                                               | *                                | Low         |
| Trouillet <i>et al.</i> (2002) P | *                                                         | *                                   | *                         | *                                                                        | *<br>(unmatched; adjusted analysis)                                               | *                                         | *                                               | *                                | Medium      |
| Tumbarello <i>et al.</i> (2013)  | *                                                         | *                                   | *                         | *                                                                        | *<br>(unmatched; adjusted analysis)                                               | *                                         | *                                               | *                                | Medium      |
| Zavascki <i>et al.</i> (2006) P  | *                                                         | *                                   | *                         | *                                                                        | *<br>(unmatched; adjusted analysis; comparison by outcome)                        | *                                         | *                                               | *                                | Medium      |

P=prospective studies
